# Supplementary material
Source: publisher figshare collection journal article supplement (https://tandf.figshare.com/ndownloader/files/33360485)
Supplement: Supplementary file 1 [file 33360485]

**Severity and 90-day survival of SARS-CoV-2 infection among patients with haematological disorders - Supplementary material**

**Supplementary table 1** Basic descriptives at time of verified SARS-CoV-2 infection in patients with haematological disease

|  | **All patients (n=108)** | **Multiple myeloma (n=20)** | **Chronic lymphocytic leukaemia / lymphoma (n=49)** | **Acute leukaemia / Myelodysplastic syndrome (n=14)** | **Other (n=25)** |
| --- | --- | --- | --- | --- | --- |
| Age, mean(SD) | 68.5(13.8) | 68.1(9.7) | 69.8(14.7) | 70.5(12.2) | 65.2(15.6) |
| Age ≥65 years, n(%) | 75(69.4) | 12(60.0) | 36(73.5) | 10(71.4) | 17(68.0) |
| Age > 80 years, n(%) | 21(19.4) | 4(20.0) | 10(20.4) | 4(28.6) | 3(12.0) |
| Males, n(%) | 66(61.1) | 13(65.0) | 29(59.2) | 8(57.1) | 16(64.0) |
| Performance status prior to infection ≥2, n(%) | 29(26.9) | 6(30.0) | 11(22.4) | 5(35.7) | 7(28.0) |
| BMI ≥30, n(%) | 14(14.4) | 5(25.0) | 4(9.1) | 1(7.7) | 4(20.0) |
| Current smokers, n(%) | 8(8.8) | 2(14.3) | 5(11.4) | 0(0.0) | 1(4.3) |
| Living alone, n(%) | 33(30.6) | 3(15.0) | 18(36.7) | 6(42.9) | 6(24.0) |
| Home care, n(%) | 25(23.6) | 6(33.3) | 12(24.5) | 3(21.4) | 4(16.0) |
| Charlson comorbidity index score >2, n(%) | 24(22.2) | 4(20.0) | 11(22.4) | 5(35.7) | 4(16.0) |
| Cumulative illness rating scale, mean (SD) | 6.4(4.5) | 8.2(5.2) | 6.0(4.3) | 6.3(3.5) | 5.8(5.0) |
| Heart disease, n(%) | 13(12.0) | 1(5.0) | 6(12.2) | 1(7.1) | 5(20.0) |
| Lung disease, n(%) | 17(15.7) | 2(10.0) | 11(22.4) | 1(7.1) | 3(12.0) |
| Diabetes, n(%) | 12(11.1) | 4(20.0) | 4(8.2) | 1(7.1) | 3(12.0) |
| Renal disease, n(%) | 4(3.7) | 1(5.0) | 2(4.1) | 1(7.1) | 0(0.0) |
| Liver disease, n(%) | 5(4.6) | 1(5.0) | 3(6.1) | 1(7.1) | 0(0.0) |
| Solid cancer, n(%) | 8(7.4) | 1(5.0) | 5(10.2) | 2(14.3) | 0(0.0) |
| Treatment for haematological disorder, n(%) | | | | | |
| - Ongoing | 60(55.6) | 17(85.0) | 19(38.8) | 12(85.7) | 12(48.0) |
| - Recent (0-6 months) | 12(11.1) | 0(0.0) | 9(18.4) | 1(7.1) | 2(8.0) |
| - Previous (>6 months) | 17(15.7) | 1(5.0) | 8(16.3) | 0(0.0) | 8(32.0) |
| - Untreated | 19(17.6) | 2(10.0) | 13(26.5) | 1(7.1) | 3(12.0) |
| Stem cell transplantation, n(%) | | | | | |
| - No | 95(88.0) | 13(65.0) | 46(93.9) | 13(92.9) | 23(92.0) |
| - Allogeneic | 3(2.8) | 0(0.0) | 1(2.0) | 1(7.1) | 1(4.0) |
| - Autologous | 10(9.3) | 7(35.0) | 2(4.1) | 0(0.0) | 1(4.0) |
| Remission status, n(%) | | | | | |
| - CR | 24(34.3) | 4(36.4) | 10(31.2) | 2(22.2) | 8(44.4) |
| - PR | 11(15.7) | 3(27.3) | 6(18.8) | 0(0.0) | 2(11.1) |
| - SD/PD | 35(50.0) | 4(36.4) | 16(50.0) | 7(77.8) | 8(44.4) |
| Neutrophils x 109/l, mean(SD) | 5.5(8.7) | 5.4(3.4) | 4.3(3.1) | 10.5(22.0) | 4.8(3.8) |
| Neutrophils < 1.0 x 109/l, n(%) | 13(13.8) | 0(0.0) | 4(9.5) | 6(46.2) | 3(14.3) |
| Lymphocytes x 109/l, mean(SD) | 4.2(14.3) | 0.7(0.5) | 7.9(20.8) | 2.1(3.2) | 1.0(0.6) |
| Lymphocytes < 1.0 x 109/l, n(%) | 43(50.6) | 8(53.3) | 18(47.4) | 6(54.5) | 11(52.4) |
| IgG, mean(SD) | 9.6(8.7) | 12.9(13.5) | 7.4(4.2) | 13.6(14.8) | 10.2(2.1) |
| IgG < 5.0 g/l, n(%) | 17(26.2) | 5(29.4) | 11(29.7) | 1(20.0) | 0(0.0) |

* Myeloproliferative neoplasms, immune thrombocytopenia, paroxysmal nocturnal hemoglobinuria, aplastic anaemia, etc.

**Supplementary table 2** Patient characteristics, and severity and outcome 90 days of SARS-CoV-2 infection in patients with haematological disease

|  | **Mild (n=61)** | **Severe (n=34)** | **Critical (n=12)** |
| --- | --- | --- | --- |
| Age, mean(SD) | 66.7(12.3) | 70.9(17.1) | 69.7(10.0) |
| Age ≥65 years, n(%) | 39(63.9) | 27(79.4) | 8(66.7) |
| Age > 80 years (%) | 7(11.5) | 11(32.4) | 2(16.7) |
| Males (%) | 41(67.2) | 17(50.0) | 8(66.7) |
| Performance status prior to infection ≥2 (%) | 11(18.0) | 13(38.2) | 4(33.3) |
| BMI ≥30 (%) | 9(16.4) | 2(6.7) | 3(27.3) |
| Current smokers (%) | 2(4.1) | 4(12.5) | 2(22.2) |
| Living alone (%) | 12(19.7) | 14(41.2) | 6(50.0) |
| Home care (%) | 9(15.3) | 10(29.4) | 5(41.7) |
| Charlson comorbidity index score ≥1 (%) | 10(16.4) | 9(26.5) | 5(41.7) |
| Cumulative illness rating scale, mean(SD) | 5.5(4.2) | 7.7(5.0) | 6.8(4.4) |
| Heart disease (%) | 5(8.2) | 7(20.6) | 1(8.3) |
| Lung disease (%) | 6(9.8) | 9(26.5) | 2(16.7) |
| Diabetes (%) | 6(9.8) | 4(11.8) | 2(16.7) |
| Renal disease (%) | 2(3.3) | 0(0.0) | 2(16.7) |
| Liver disease (%) | 3(4.9) | 0(0.0) | 2(16.7) |
| Solid cancer (%) | 3(4.9) | 3(8.8) | 2(16.7) |
| Treatment for haematological disorder (%) |  |  |  |
| - Ongoing | 30(49.2) | 25(73.5) | 5(41.7) |
| - Recent (0-6 months) | 8(13.1) | 0(0.0) | 3(25.0) |
| - Previous (>6 months) | 13(21.3) | 3(8.8) | 1(8.3) |
| - Untreated | 10(16.4) | 6(17.6) | 3(25.0) |
| Remission status (%) |  |  |  |
| - CR | 21(48.8) | 1(5.3) | 2(28.6) |
| - PR | 7(16.3) | 4(21.1) | 0(0.0) |
| - SD/PD | 15(34.9) | 14(73.7) | 5(71.4) |
| Neutrophils x 109/l, mean(SD) | 4.0(2.7) | 6.9(13.8) | 7.5(6.0) |
| Neutrophils < 1.0 x 109/l (%) | 4(8.2) | 7(21.2) | 2(16.7) |
| Lymphocytes x 109/l, mean(SD) | 2.7(7.7) | 6.8(21.5) | 2.2(3.2) |
| Lymphocytes < 1.0 x 109/l (%) | 23(54.8) | 15(46.9) | 5(45.5) |
| IgG, mean(SD) | 9.7(9.3) | 9.5(5.5) | 9.2(13.4) |
| IgG < 5.0 g/l (%) | 9(23.7) | 4(21.1) | 4(57.1) |
| Haematological subtype (%) |  |  |  |
| - Multiple myeloma | 15(24.6) | 3(8.8) | 2(16.7) |
| - Chronic lymphocytic leukaemia / lymphoma | 26(42.6) | 19(55.9) | 3(25.0) |
| - Acute leukaemia / Myelodysplastic syndrome | 5(8.2) | 5(14.7) | 4(33.3) |
| - Other* | 15(24.6) | 7(20.6) | 3(25.0) |
| Supplementary oxygen (%) | 22(36.1) | 27(79.4) | 12(100.0) |
| ICU (%) | 6(9.8) | 8(23.5) | 9(75.0) |
| CPAP / NIV (%) | 3(4.9) | 7(20.6) | 0(0.0) |
| Ventilator (%) | 4(6.6) | 4(11.8) | 8(66.7) |
| 90-days survival (95% CI) | 90(83-98) | 53(39-73) | 42(21-81) |
| Reductions in functional level |  |  |  |
| - More fatigued than usual (%) | 14(46.7) | 9(75.0) | 3(100.0) |
| - More dyspnea than usual (%) | 11(42.3) | 7(70.0) | 2(66.7) |
| - Functional abilities reduced (%) | 11(39.3) | 9(81.8) | 3(100.0) |

* Myeloproliferative neoplasms, immune thrombocytopenia, paroxysmal nocturnal hemoglobinuria, aplastic anaemia, etc.
